# Supplementary material for: Association of Common Variants in HNF1A Gene with Serum AFP Level in Healthy Chinese Individuals and HCC Patients
Source: Hindawi journal article supplement (doi:10.1155/2019/6273497), 2019-11-07
Supplement: f1 [file 6273497.f1.pdf]

## Supplementary materials

**Supplementary Table 1** Primers and probes used for genotyping HNF1A SNPs

| SNP             | Region | Primer name      | Sequence (5' to 3')                                      |
|-----------------|--------|------------------|----------------------------------------------------------|
| rs1169288 (A/C) | exon 1 | Forward primer A | 5'-GGC TGA GCA AAG AGG CAC T <u><i>AA</i></u> -3'        |
|                 |        | Forward primer C | 5'-GGC TGA GCA AAG AGG CAC T <u><i>AC</i></u> -3'        |
|                 |        | Reverse primer   | 5'- CAG GAC TCC CCC TTG TCC AG-3'                        |
|                 |        | Probe            | 5'-FAM-CCA GGC ACT GGG TGA GCC GGG GCC- BHQ-1-3'         |
| rs2464196 (G/A) | exon 7 | Forward primer G | 5'-GCA GAG CCA TGT GAC CCA G <u><i>TG</i></u> -3'        |
|                 |        | Forward primer A | 5'-GCA GAG CCA TGT GAC CCA G <u><i>TA</i></u> -3'        |
|                 |        | Reverse primer   | 5'-GCT CAC CGT GGG GGC TCT-3'                            |
|                 |        | Probe            | 5'-FAM-CCC TTC ATG GCC ACC ATG GCT CAG CTG- BHQ-1-3'     |
| rs1169310 (C/T) | 3'UTR  | Forward primer   | 5'-GGA CCG CTA CAC CAC TCT G-3'                          |
|                 |        | Reverse primer C | 5'-GAA CAA GGC CAC GCT GAT <u><i>AC</i></u> -3'          |
|                 |        | Reverse primer T | 5'-AGA ACA AGG CCA CGC TGA T <u><i>AT</i></u> -3'        |
|                 |        | Probe            | 5'-FAM-AGC TCA GCA GGT CAC AGC TAC ACA GGC<br>C-BHQ-1-3' |

The underlined *italic* bases near the 3'end of the primers are mismatched to increase the specificity of allele discrimination.

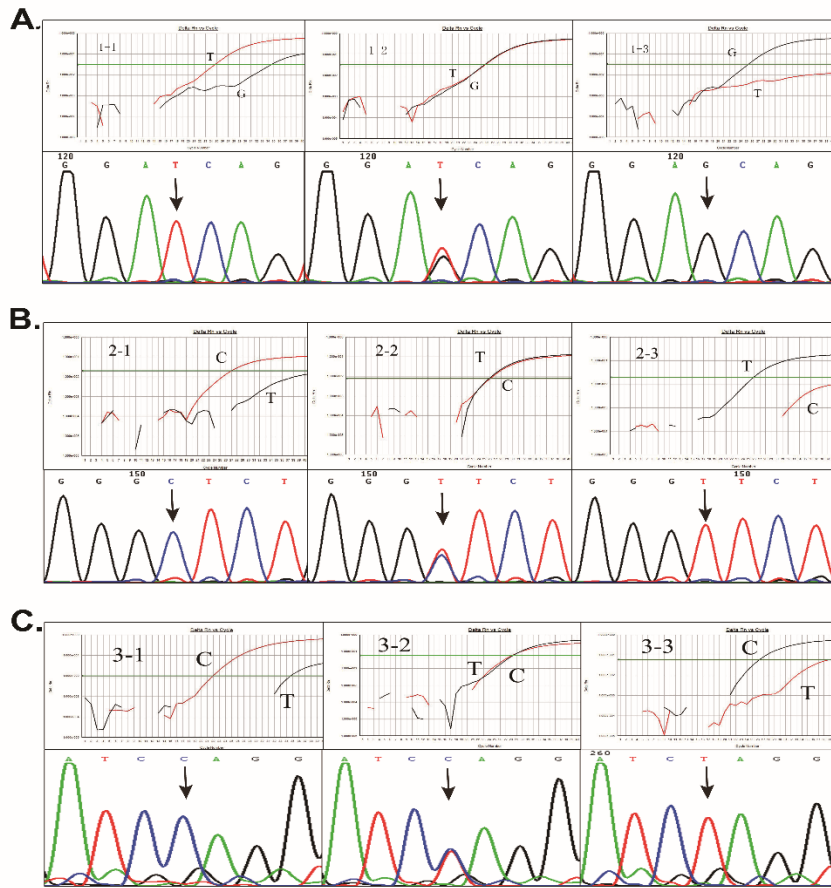

**Supplementary Figure 1 HNF1A SNP genotyping and DNA sequencing results.** **A.** Real-time ARMS-PCR amplification plots and sequencing results for HNF1A-rs1169288 (T/G). ARMS-PCR was performed using two reactions. T: Amplification curves of T allele; G: amplification curves of G allele. The different  $\Delta$  cycle thresholds ( $\Delta$ ct= Ct value of T allele minus Ct value of G allele) were used to determine the TT, TG or GG alleles, and the corresponding sequencing results are shown below with black arrows. 1-1: TT genotype, 1-2: TG genotype, 1-3: GG genotype. **B.** Real-time ARMS-PCR amplification plots and sequencing results for HNF1A-rs2464196 (C/T). ARMS-PCR was performed using two reactions. C: Amplification curves of C allele; T: amplification curves of T allele. The different  $\Delta$  cycle thresholds ( $\Delta$ ct= Ct value of C allele minus Ct value of T allele) were used to determine the CC, CT or TT alleles, and

the corresponding sequencing results are shown below with black arrows. 2-1: CC genotype, 2-2: CT genotype, 2-3: TT genotype. **C.** Real-time ARMS-PCR amplification plots and sequencing results for HNF1A-rs1169310 (C/T). ARMS-PCR was performed using two reactions. C: Amplification curves of C allele; T: amplification curves of T allele. The different  $\Delta$  cycle thresholds ( $\Delta Ct = Ct \text{ value of C allele} - Ct \text{ value of T allele}$ ) were used to determine the CC, CT or TT alleles, and the corresponding sequencing results are shown below with black arrows. 3-1: CC genotype, 3-2: CT genotype, 3-3: TT genotype.

**Supplementary Table 2 Basic characteristics of apparently healthy subjects compared among the HNF1A genotypes**

|                           | Total          | rs1169288      |                |                | <i>P</i> | rs2464196      |                |                | <i>P</i> | rs1169310      |                |                | <i>P</i> |
|---------------------------|----------------|----------------|----------------|----------------|----------|----------------|----------------|----------------|----------|----------------|----------------|----------------|----------|
|                           |                | AA (n=311)     | AC (n=483)     | CC (n=216)     |          | GG (n=290)     | GA (n=473)     | AA (n=247)     |          | CC (n=282)     | CT (n=478)     | TT (n=250)     |          |
| Gender                    | 1010           | 189/122        | 294/189        | 132/84         | 0.997    | 173/117        | 282/191        | 160/87         | 0.355    | 166/116        | 287/191        | 162/88         | 0.327    |
| (male/female)             |                |                |                |                |          |                |                |                |          |                |                |                |          |
| Age (years)               | 48.22±7.80     | 47.77±0.44     | 48.31±0.36     | 48.69±0.51     | 0.387    | 47.68±7.63     | 48.45±7.78     | 48.43±8.05     | 0.378    | 47.55±7.63     | 48.49±7.79     | 48.48±8.00     | 0.230    |
| BMI (kg/m <sup>2</sup> )  | 24.56±2.58     | 24.63±0.14     | 24.51±0.12     | 24.56±0.19     | 0.828    | 24.69±2.46     | 24.42±2.57     | 24.67±2.74     | 0.288    | 24.67±2.50     | 24.45±2.54     | 24.66±2.73     | 0.414    |
| Systolic pressure (mmHg)  | 116.80±15.34   | 115.99±0.89    | 116.79±0.70    | 118.00±1.03    | 0.334    | 117.39±16.27   | 116.25±14.75   | 117.17±15.37   | 0.557    | 117.18±16.36   | 116.28±14.75   | 117.37±15.30   | 0.589    |
| Diastolic pressure (mmHg) | 75.74±9.85     | 75.11±0.55     | 75.80±0.46     | 76.50±0.63     | 0.280    | 76.04±10.30    | 75.62±9.27     | 75.60±10.42    | 0.827    | 75.99±10.12    | 75.64±9.40     | 75.64±10.42    | 0.879    |
| LDL (mmol/L)              | 2.65±0.69      | 2.69±0.04      | 2.64±0.03      | 2.62±0.05      | 0.437    | 2.70±0.68      | 2.66±0.68      | 2.57±0.70      | 0.076    | 2.72±0.70      | 2.65±0.67      | 2.57±0.70      | 0.054    |
| HDL (mmol/L)              | 0.96±0.23      | 0.96±0.01      | 0.95±0.01      | 0.96±0.02      | 0.824    | 0.97±0.26      | 0.96±0.22      | 0.94±0.23      | 0.282    | 0.97±0.26      | 0.96±0.22      | 0.94±0.23      | 0.255    |
| TC (mmol/L)               | 4.98±0.88      | 5.00±0.05      | 4.97±0.04      | 4.97±0.06      | 0.890    | 5.04±0.89      | 4.97±0.86      | 4.92±0.88      | 0.275    | 5.06±0.91      | 4.97±0.85      | 4.92±0.88      | 0.172    |
| AST (U/L)                 | 20.40          | 20.50          | 20.50          | 20.30          | 0.189    | 20.85          | 20.10          | 20.60          | 0.056    | 20.85          | 20.15          | 20.60          | 0.107    |
|                           | (17.40, 24.80) | (17.50, 25.00) | (17.60, 25.20) | (16.90, 24.68) |          | (17.88, 25.70) | (17.30, 24.30) | (17.60, 25.70) |          | (17.88, 25.35) | (17.27, 24.33) | (17.60, 25.63) |          |
| FPG (mmol/L)              | 5.23±0.90      | 5.17±0.05      | 5.26±0.04      | 5.26±0.06      | 0.376    | 5.21±0.99      | 5.23±0.81      | 5.27±0.93      | 0.792    | 5.23±1.00      | 5.22±0.81      | 5.26±0.93      | 0.832    |
| ALT (U/L)                 | 18.50          | 18.50          | 18.60          | 17.40          | 0.199    | 19.25          | 18.10          | 18.80          | 0.165    | 19.15          | 18.15          | 18.95          | 0.333    |
|                           | (13.10, 26.83) | (12.80, 26.9)  | (13.40, 27.9)  | (12.40, 25.1)  |          | (13.40, 27.40) | (13.00, 25.60) | (13.10, 27.20) |          | (13.33, 27.40) | (13.00, 26.10) | (13.10, 26.98) |          |
| TG (mmol/L)               | 1.27           | 1.28           | 1.24           | 1.31           | 0.843    | 1.28           | 1.23           | 1.33           | 0.067    | 1.28           | 1.23           | 1.33           | 0.092    |
|                           | (0.88, 1.89)   | (0.89, 1.90)   | (0.85, 1.89)   | (0.88, 1.86)   |          | (0.90, 1.97)   | (0.84, 1.82)   | (0.91, 1.93)   |          | (0.86, 1.94)   | (0.84, 1.82)   | (0.91, 1.94)   |          |
| GGT (U/L)                 | 21.50          | 22.70          | 21.30          | 21.00          | 0.368    | 23.70          | 20.70          | 21.40          | 0.190    | 23.10          | 20.85          | 21.40          | 0.320    |
|                           | (14.78, 35.73) | (14.90, 36.20) | (14.70, 36.80) | (14.68, 33.40) |          | (15.18, 36.95) | (14.10, 35.75) | (15.50, 33.60) |          | (15.05, 36.33) | (14.10, 36.35) | (15.48, 34.15) |          |
| CRP (mg/L)                | 1.08           | 1.13           | 1.08           | 0.98           | 0.023    | 1.11           | 1.05           | 1.06           | 0.276    | 1.12           | 1.05           | 1.06           | 0.143    |
|                           | (0.68, 1.81)   | (0.72, 1.95)   | (0.69, 1.78)   | (0.57, 1.58)   |          | (0.67, 2.09)   | (0.67, 1.74)   | (0.68, 1.61)   |          | (0.70, 2.09)   | (0.67, 1.73)   | (0.69, 1.67)   |          |
| Fatty liver (%)           | 44.70          | 43.40          | 45.30          | 44.90          | 0.864    | 43.10          | 44.20          | 47.40          | 0.588    | 43.30          | 44.10          | 47.20          | 0.629    |

Data are presented as mean ± standard deviation (SD) or n (%). Non-normally distributed data are presented as median (interquartile range [IQR]). The TG, CRP, ALT, AST and GGT data were

In-transformed before analysis. *P* value indicates the comparison among the genotypes of each SNP locus of HNF1A using ANOVA for continuous variables and Chi-square test for categorical variables and SNP distribution frequencies.

**Supplementary Table 3 HNF1A rs2464196-rs1169310 haplotype frequencies in healthy Chinese subjects and HCC patients.**

|    | rs2464196 | rs1169310 | Frequency (%)    |              |
|----|-----------|-----------|------------------|--------------|
|    |           |           | Healthy subjects | HCC patients |
| H1 | G         | C         | 50.98            | 48.65        |
| H2 | G         | T         | 1.15             | 0.54         |
| H3 | A         | C         | 0.60             | 0.27         |
| H4 | A         | T         | 47.27            | 50.54        |

**Supplementary Table 4 Associations of HNF1A rs2464196 and rs1169310 haplotypes with AFP level in healthy Chinese subjects.**

|         | R <sup>2</sup> | Haplotype | $\beta$ | 95% CI         | SE    | <i>P</i> |
|---------|----------------|-----------|---------|----------------|-------|----------|
| Model 1 | 0.010          | GC        | 0       |                |       |          |
|         |                | AT        | -0.080  | -0.117, -0.043 | 0.019 | <0.001   |
|         |                | Other     | 0.072   | -0.071, 0.214  | 0.072 | 0.324    |
| Model 2 | 0.023          | GC        | 0       |                |       |          |
|         |                | AT        | -0.081  | -0.118, -0.044 | 0.019 | <0.001   |
|         |                | Other     | 0.069   | -0.072, 0.21   | 0.072 | 0.339    |
| Model 3 | 0.073          | GC        | 0       |                |       |          |
|         |                | AT        | -0.074  | -0.111, -0.038 | 0.018 | <0.001   |
|         |                | Other     | 0.056   | -0.083, 0.194  | 0.071 | 0.430    |

Model 1: no adjustment; Model 2: adjusted for age, gender, and BMI; Model 3: adjusted for age, gender, BMI, blood pressure, HDL, TC, lnAST, lnALT, lnTG, lnGGT, lnCRP, FPG, and fatty liver.  $\beta$  means the unstandardized beta coefficients ( $\beta$ ) for the effects of HNF1A polymorphisms on the AFP levels. *P* values for the associations of the haplotypes of rs2464196 and rs1169310 with the lnAFP level in healthy subjects.

**Supplementary Table 5 Associations of HNF1A rs2464196- rs1169310 haplotypes with AFP level in Chinese HCC patients.**

|         | R <sup>2</sup> | Haplotype | $\beta$ | 95% CI         | SE    | <i>P</i> |
|---------|----------------|-----------|---------|----------------|-------|----------|
| Model 1 | 0.022          | GC        | 0       |                |       |          |
|         |                | AT        | -1.033  | -1.744, -0.321 | 0.362 | 0.005    |
|         |                | Other     | -0.437  | -4.403, 3.529  | 2.017 | 0.829    |
| Model 2 | 0.073          | GC        | 0       |                |       |          |
|         |                | AT        | -0.899  | -1.6, -0.199   | 0.356 | 0.012    |
|         |                | Other     | -0.432  | -4.306, 3.441  | 1.970 | 0.826    |
| Model 3 | 0.603          | GC        | 0       |                |       |          |
|         |                | AT        | -0.474  | -0.948, 0      | 0.241 | 0.049    |
|         |                | Other     | -0.477  | -3.046, 2.092  | 1.306 | 0.715    |

Model 1: no adjustment; Model 2: adjusted for age and gender; Model 3: adjusted for age, gender, lnALT, lnAST, HBV and HCV infection status, tumor size, clinical stage, and differentiation degree.  $\beta$  means the unstandardized beta coefficients ( $\beta$ ) for the effects of HNF1A polymorphisms on the AFP levels. *P* values for the associations of the haplotypes of rs2464196 and rs1169310 with the lnAFP level in HCC patients.
